# Supplementary material for: Peripheral nerve conduction speed shows a disease control-dependent and -independent drop in type 1 diabetes mellitus in children
Source: bioRxiv or medRxiv preprint supplement (doi:10.1101/2022.12.08.22283120), 2022-12-13

Figure 1

**A** N. peroneus

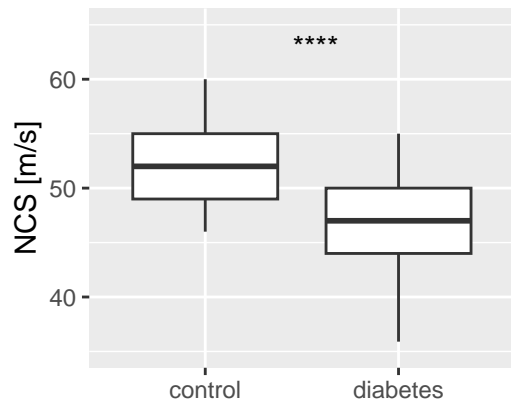

**B** N. tibialis

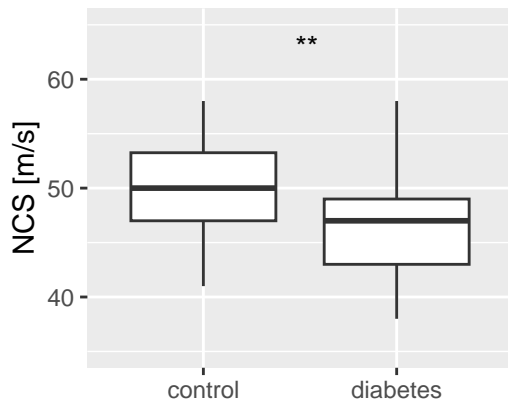

**C** N. medianus (motor)

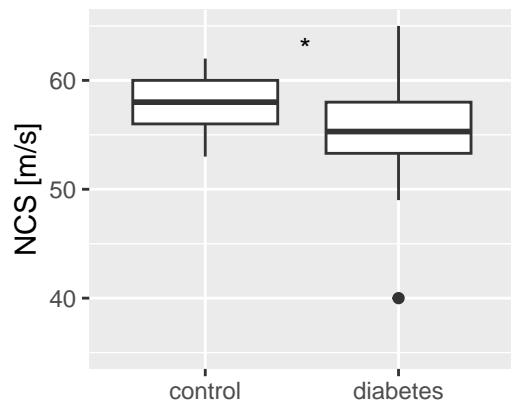

**D** N. medianus (sensory)

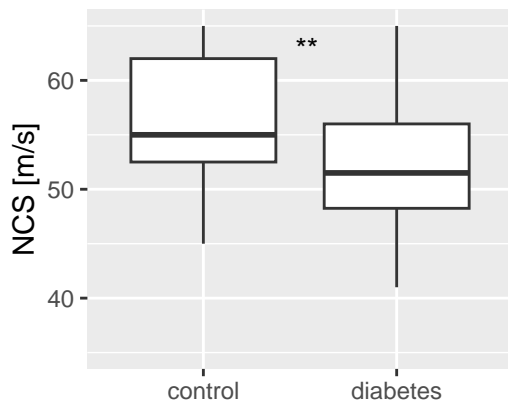

Supplement: Supplementary file [file media-1.pdf]
