# Supplementary material for: Peripheral nerve conduction speed shows a disease control-dependent and -independent drop in type 1 diabetes mellitus in children
Source: bioRxiv or medRxiv preprint supplement (doi:10.1101/2022.12.08.22283120), 2022-12-13

**A** NCS\_Peroneus vs. age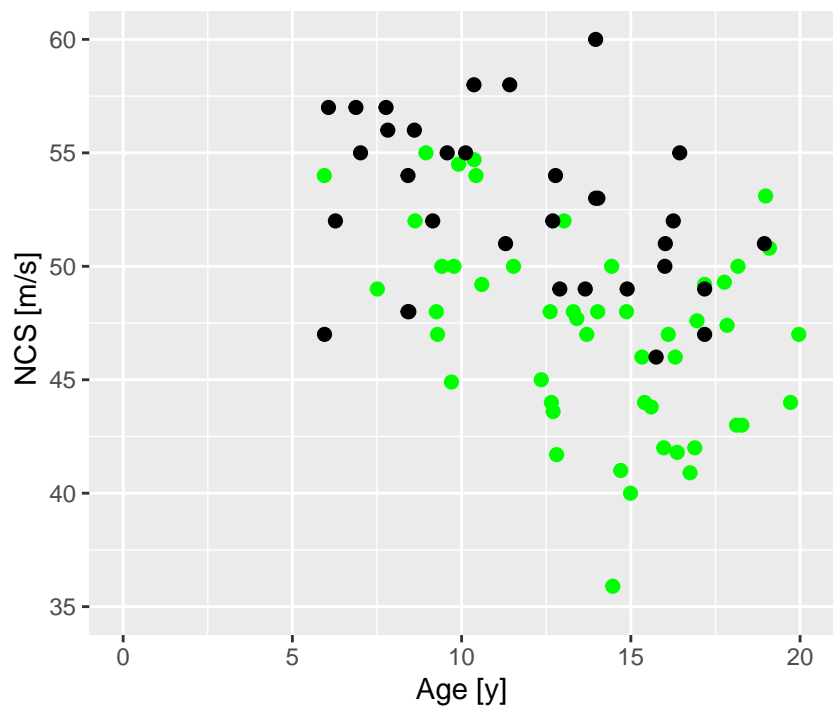**B** NCS\_Tibialis vs. age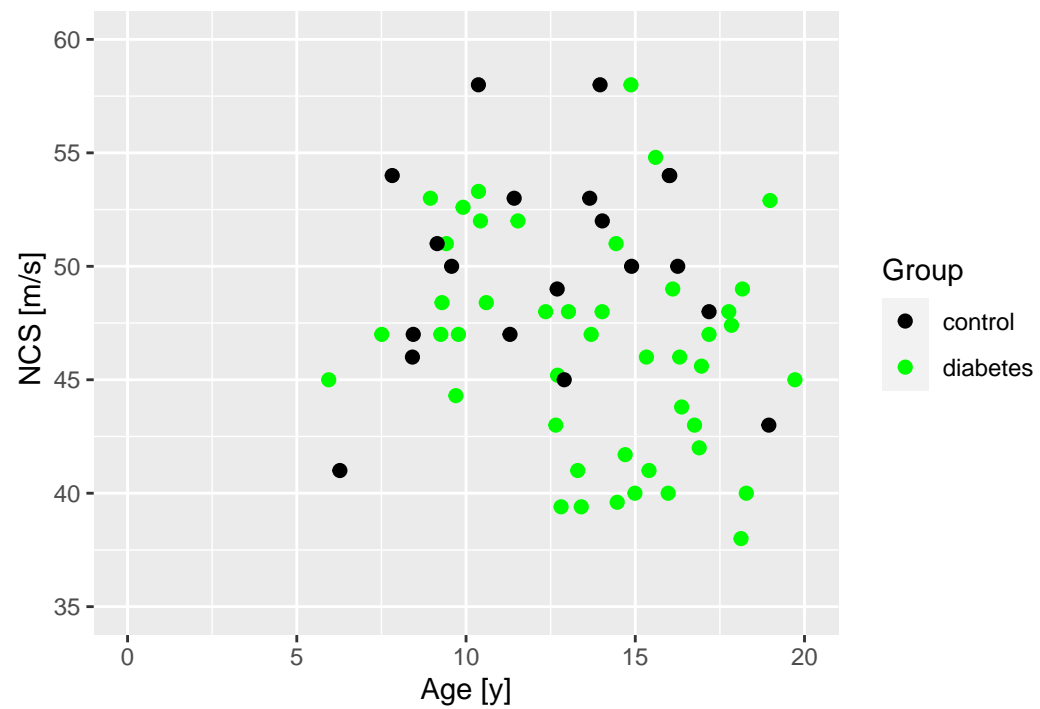**C** NCS Medianus Motor vs. age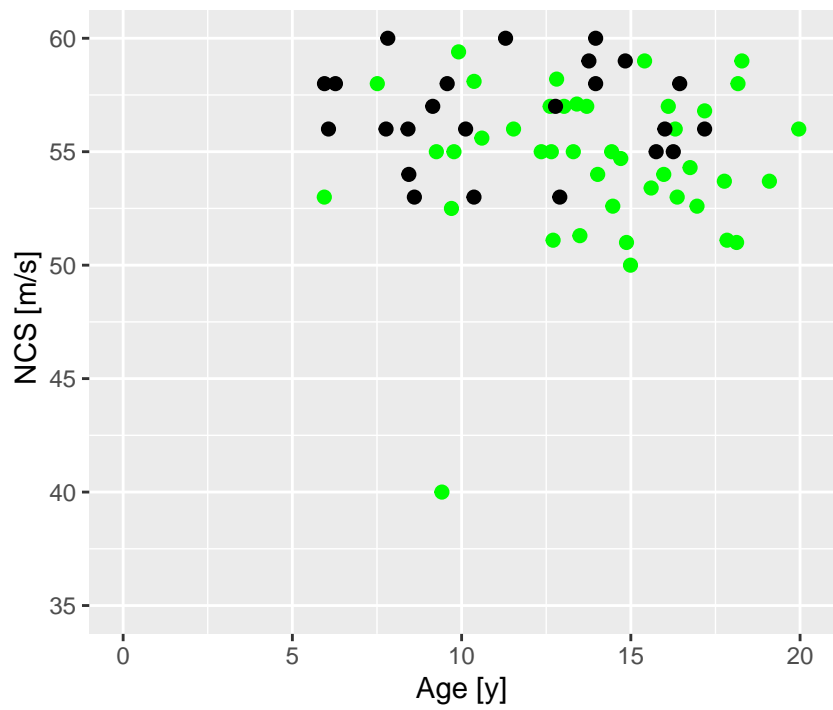**D** NCS Medianus Sensory vs. age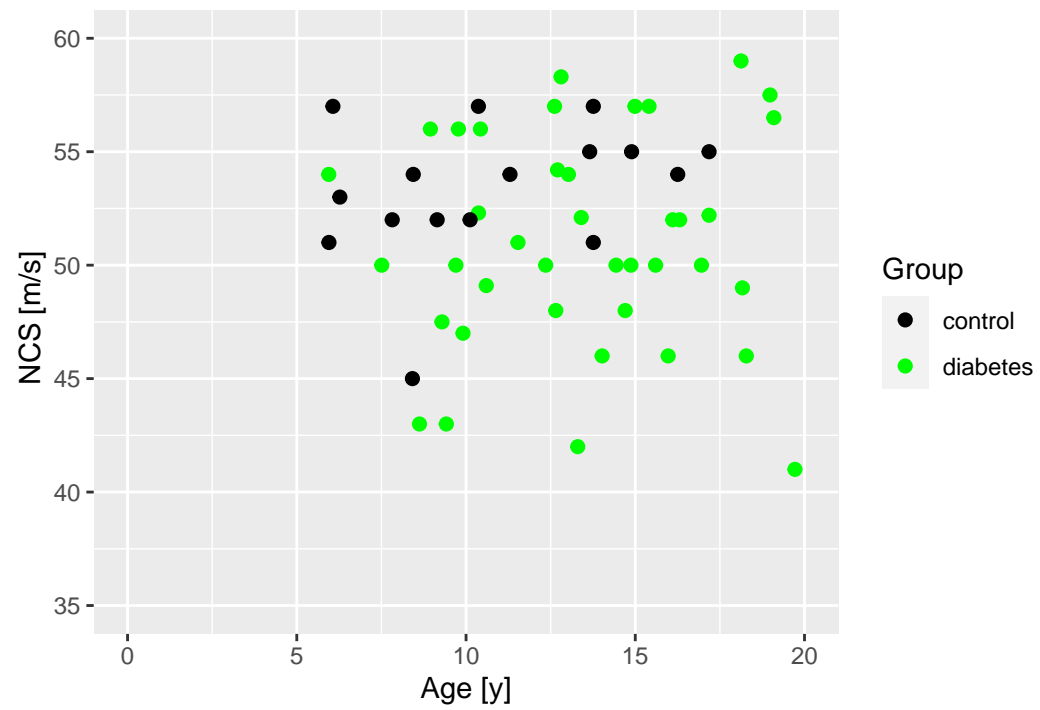

Supplement: Supplementary file [file media-4.pdf]
