# Supplementary material for: Peripheral nerve conduction speed shows a disease control-dependent and -independent drop in type 1 diabetes mellitus in children
Source: bioRxiv or medRxiv preprint supplement (doi:10.1101/2022.12.08.22283120), 2022-12-13

## Supplementary Figure 2

Motor NCS N. peroneus vs. body length

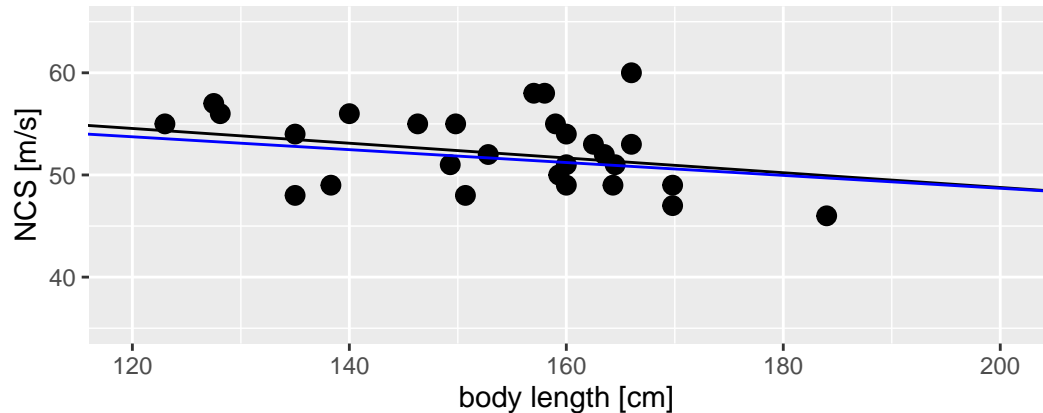

Supplement: Supplementary file [file media-5.pdf]
