# Supplementary material for: Peripheral nerve conduction speed shows a disease control-dependent and -independent drop in type 1 diabetes mellitus in children
Source: bioRxiv or medRxiv preprint supplement (doi:10.1101/2022.12.08.22283120), 2022-12-13

**A** dNCS peroneus vs. avgHB1C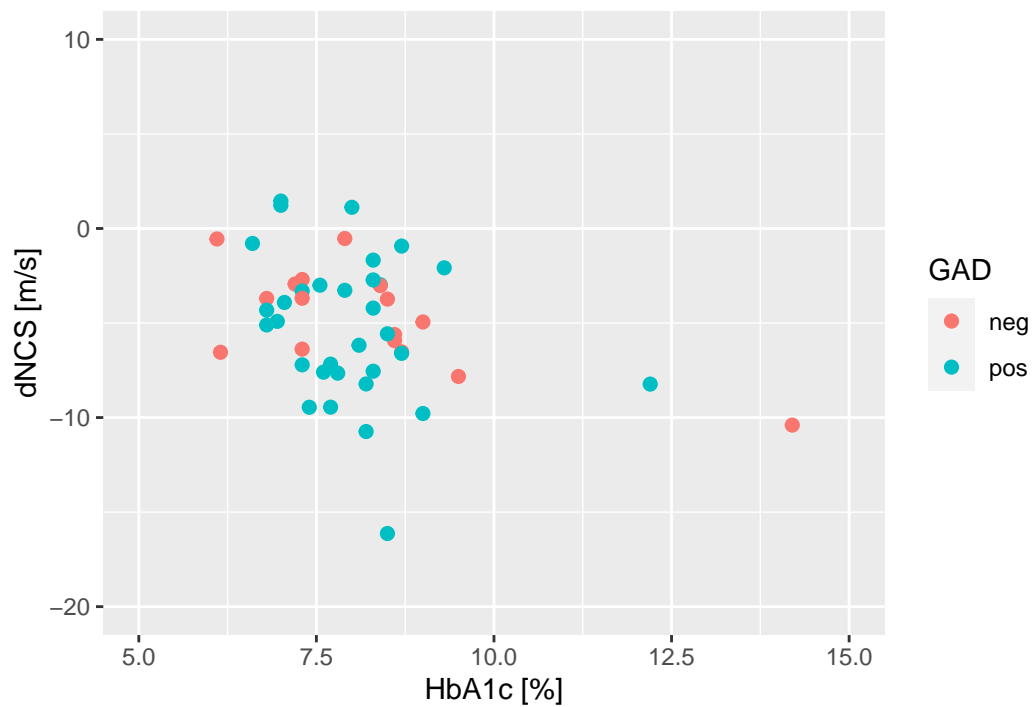**B** dNCS peroneus vs. avgHB1C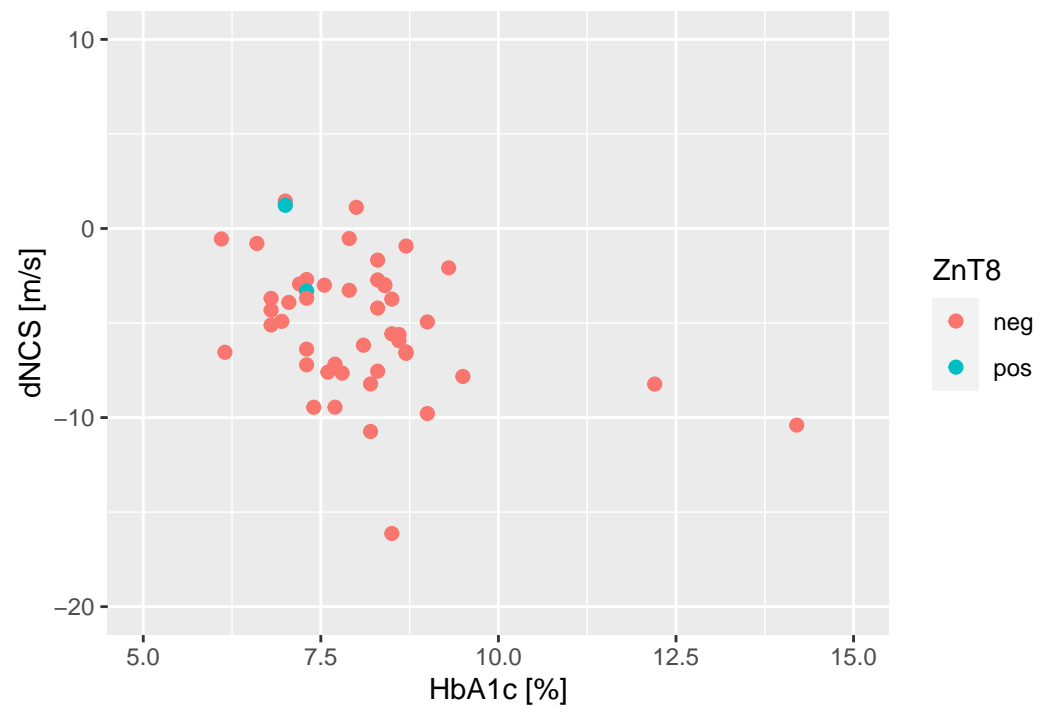**C** dNCS peroneus vs. avgHB1C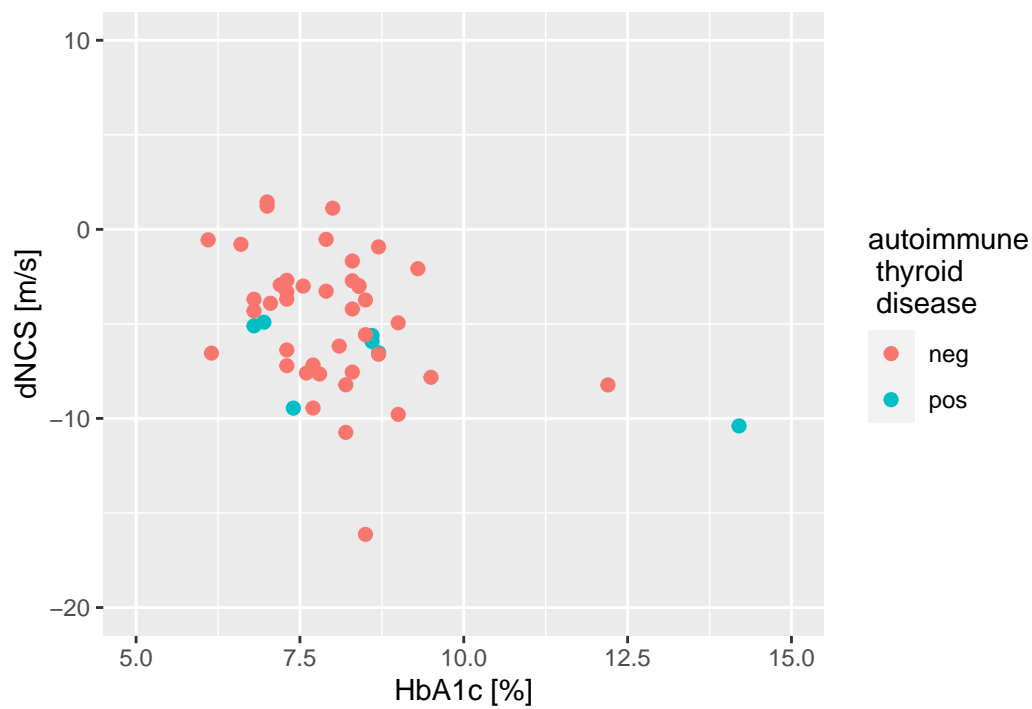**D** dNCS peroneus vs. avgHbA1c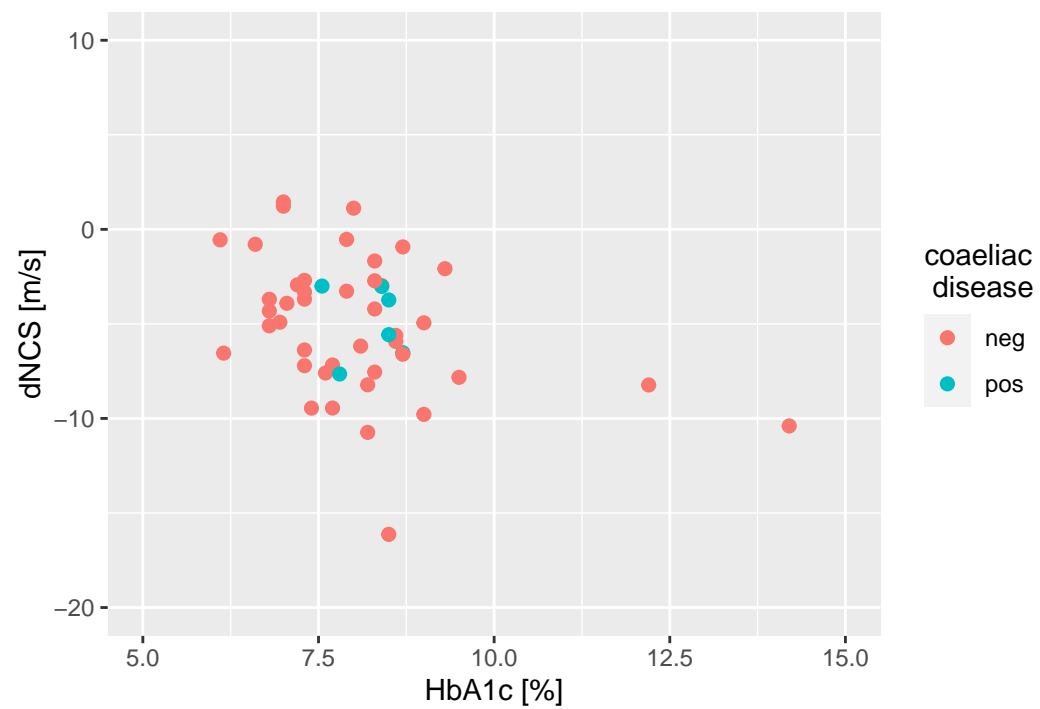

Supplement: Supplementary file [file media-6.pdf]
