# Supplementary material for: Peripheral nerve conduction speed shows a disease control-dependent and -independent drop in type 1 diabetes mellitus in children
Source: bioRxiv or medRxiv preprint supplement (doi:10.1101/2022.12.08.22283120), 2022-12-13
Supplement: Supplementary file [file media-8.pdf]

Table 1: Summary of Studydata (n=54, #Male=28, #PosAK=48, #Sensor=38, #Pump=28)

| <b>Parameter</b>               | <b>Min</b> | <b>Mean</b> | <b>Max</b> |
|--------------------------------|------------|-------------|------------|
| Age at onset (y)               | 1.65       | 8.44        | 15.07      |
| Age at NCS (y)                 | 5.94       | 14.52       | 23.82      |
| Duration of DM (y)             | 0.59       | 6.08        | 18.42      |
| Height (cm)                    | 120.40     | 160.90      | 186.50     |
| Weight (kg)                    | 20.70      | 57.02       | 94.30      |
| HbA1c (%)                      | 5.60       | 7.99        | 12.90      |
| Mean HbA1c last five years (%) | 6.10       | 8.04        | 14.20      |
| TIR (%)                        | 21.00      | 54.78       | 97.00      |
| Mean glucose (mmol/l)          | 4.50       | 9.75        | 15.70      |
| SD of mean glucose (mmol/l)    | 1.30       | 4.37        | 6.80       |
| Coefficient of variation (%)   | 18.30      | 43.60       | 69.60      |
