# Supplementary material for: Peripheral nerve conduction speed shows a disease control-dependent and -independent drop in type 1 diabetes mellitus in children
Source: bioRxiv or medRxiv preprint supplement (doi:10.1101/2022.12.08.22283120), 2022-12-13
Supplement: Supplementary file [file media-9.pdf]

Supplementary Table 1: Raw Data

| Demographics |               |             | Diabetes Data    |                 |                  |                     | NCS Data       |              |              |
|--------------|---------------|-------------|------------------|-----------------|------------------|---------------------|----------------|--------------|--------------|
| ID           | age onset [y] | age NCS [y] | duration DBM [y] | HB1c at NCS [%] | mean 5y HB1c [%] | betacell antibodies | peroneus [m/s] | tibial [m/s] | median [m/s] |
| 28           | 0-5           | 5-10        | 1.8              | 6.20            | 6.60             | pos                 | 54.0           | 45.0         | 53.0         |
| 24           | 0-5           | 5-10        | 5.3              | 7.40            | 8.50             | pos                 | 49.0           | 47.0         | 58.0         |
| 5            | 5-10          | 5-10        | 1.1              | 6.60            | —                | pos                 | 52.0           | —            | 61.0         |
| 46           | 5-10          | 5-10        | 0.6              | 7.80            | —                | pos                 | 55.0           | 53.0         | 62.0         |
| 57           | 0-5           | 5-10        | 4.4              | 7.70            | 9.00             | pos                 | 48.0           | 47.0         | 55.0         |
| 10           | 5-10          | 5-10        | 1.4              | 8.20            | 7.30             | pos                 | 47.0           | 48.4         | 60.9         |
| 9            | 5-10          | 5-10        | 3.9              | 7.00            | 6.80             | neg                 | 50.0           | 51.0         | 40.0         |
| 34           | 5-10          | 5-10        | 1.8              | 7.60            | 7.30             | pos                 | 44.9           | 44.3         | 52.5         |
| 42           | 5-10          | 5-10        | 2.5              | 7.50            | 8.30             | pos                 | 50.0           | 47.0         | 55.0         |
| 52           | 0-5           | 5-10        | 6.9              | 7.40            | 8.00             | pos                 | 54.5           | 52.6         | 59.4         |
| 44           | 5-10          | 10-15       | 1.3              | 7.50            | 7.00             | pos                 | 54.7           | 53.3         | 58.1         |
| 26           | 5-10          | 10-15       | 1.1              | 7.60            | —                | pos                 | 54.0           | 52.0         | 63.0         |
| 51           | 5-10          | 10-15       | 4.6              | 8.60            | 8.30             | pos                 | 49.2           | 48.4         | 55.6         |
| 50           | 5-10          | 10-15       | 3.4              | 7.10            | 7.20             | neg                 | 50.0           | 52.0         | 56.0         |
| 48           | 5-10          | 10-15       | 2.7              | 6.30            | 6.15             | pos                 | 45.0           | 48.0         | 55.0         |
| 22           | 10-15         | 10-15       | 1.9              | 6.80            | 7.30             | pos                 | 48.0           | —            | 57.0         |
| 41           | 5-10          | 10-15       | 5.0              | 8.10            | 7.70             | pos                 | 44.0           | 43.0         | 55.0         |
| 32           | 0-5           | 10-15       | 8.6              | 7.60            | 7.60             | pos                 | 43.6           | 45.2         | 51.1         |

Supplementary Table 1: Raw Data

|    |       |       |      |       |      |     |      |      |      |
|----|-------|-------|------|-------|------|-----|------|------|------|
| 14 | 10-15 | 10-15 | 1.0  | 6.30  | —    | pos | 41.7 | 39.4 | 58.2 |
| 49 | 10-15 | 10-15 | 2.0  | 7.30  | 6.10 | neg | 52.0 | 48.0 | 57.0 |
| 25 | 10-15 | 10-15 | 2.5  | 6.90  | 7.05 | pos | 48.0 | 41.0 | 55.0 |
| 15 | 0-5   | 10-15 | 10.0 | 8.40  | 8.40 | neg | 47.7 | 39.4 | 57.1 |
| 33 | 10-15 | 10-15 | 2.6  | 9.20  | 6.95 | pos | —    | —    | 51.3 |
| 45 | 5-10  | 10-15 | 7.4  | 6.40  | 6.80 | pos | 47.0 | 47.0 | 57.0 |
| 8  | 5-10  | 10-15 | 8.7  | 10.20 | 7.90 | pos | 48.0 | 48.0 | 54.0 |
| 55 | 10-15 | 10-15 | 0.7  | 5.60  | —    | pos | 50.0 | 51.0 | 55.0 |
| 43 | 5-10  | 10-15 | 4.9  | 8.80  | 8.50 | pos | 35.9 | 39.6 | 52.6 |
| 6  | 0-5   | 10-15 | 13.1 | 7.90  | 9.00 | pos | 41.0 | 41.7 | 54.7 |
| 11 | 10-15 | 10-15 | 1.5  | 7.00  | 7.30 | pos | 48.0 | 58.0 | 51.0 |
| 21 | 5-10  | 10-15 | 7.8  | 9.20  | 8.20 | pos | 40.0 | 40.0 | 50.0 |
| 29 | 10-15 | 15-20 | 3.5  | 6.60  | 6.80 | pos | 46.0 | 46.0 | 68.0 |
| 56 | 5-10  | 15-20 | 10.2 | 8.60  | 8.70 | neg | 44.0 | 41.0 | 59.0 |
| 39 | 5-10  | 15-20 | 5.8  | 9.10  | 8.70 | pos | 43.8 | 54.8 | 53.4 |
| 12 | 5-10  | 15-20 | 8.0  | 8.50  | 8.30 | pos | 42.0 | 40.0 | 54.0 |
| 27 | 10-15 | 15-20 | 5.5  | 7.90  | 7.55 | pos | 47.0 | 49.0 | 57.0 |

Supplementary Table 1: Raw Data

|    |       |       |      |       |       |     |      |      |      |
|----|-------|-------|------|-------|-------|-----|------|------|------|
| 3  | 10-15 | 15-20 | 4.9  | 7.50  | 6.95  | pos | 46.0 | 46.0 | 56.0 |
| 36 | 10-15 | 15-20 | 4.3  | 10.10 | 7.40  | pos | 41.8 | 43.8 | 53.0 |
| 35 | 10-15 | 15-20 | 2.3  | 8.10  | 7.70  | pos | 40.9 | 43.0 | 54.3 |
| 1  | 5-10  | 15-20 | 9.5  | 10.80 | 9.50  | pos | 42.0 | 42.0 | NA   |
| 19 | 15-20 | 15-20 | 1.9  | 12.70 | 8.40  | pos | 47.6 | 45.6 | 52.6 |
| 16 | 5-10  | 15-20 | 11.4 | 8.70  | 8.30  | pos | 49.2 | 47.0 | 56.8 |
| 37 | 10-15 | 15-20 | 6.7  | 7.90  | 9.30  | pos | 49.3 | 48.0 | 53.7 |
| 40 | 10-15 | 15-20 | 6.1  | 8.10  | 8.50  | pos | 47.4 | 47.4 | 51.1 |
| 58 | 10-15 | 15-20 | 5.5  | 12.90 | 12.20 | pos | 43.0 | 38.0 | 51.0 |
| 13 | 5-10  | 15-20 | 10.8 | 7.10  | 7.90  | pos | 50.0 | 49.0 | 58.0 |
| 18 | 10-15 | 15-20 | 6.3  | 7.80  | 8.20  | pos | 43.0 | 40.0 | 59.0 |
| 30 | 5-10  | 15-20 | 10.5 | 7.40  | 7.00  | pos | 53.1 | 52.9 | 62.2 |
| 38 | 5-10  | 15-20 | 11.7 | 8.70  | 8.70  | pos | 50.8 | —    | 53.7 |
| 54 | 0-5   | 15-20 | 16.3 | 8.40  | 7.80  | pos | 44.0 | 45.0 | 65.0 |
| 4  | 10-15 | 15-20 | 7.9  | 7.10  | 7.30  | pos | 47.0 | —    | 56.0 |
| 7  | 10-15 | 20-25 | 6.1  | 6.50  | 14.20 | pos | 40.0 | 49.0 | 49.0 |
| 17 | 0-5   | 20-25 | 17.9 | 8.40  | 8.60  | pos | 44.2 | —    | 56.1 |

---

Supplementary Table 1: Raw Data

---

|    |      |       |      |      |      |     |      |      |      |
|----|------|-------|------|------|------|-----|------|------|------|
| 2  | 0-5  | 20-25 | 18.4 | 9.00 | 8.60 | neg | 45.6 | 45.9 | 59.0 |
| 31 | 5-10 | 20-25 | 15.7 | 7.60 | 8.10 | pos | 44.0 | 45.0 | 58.0 |

---
