# Supplementary material for: Peripheral nerve conduction speed shows a disease control-dependent and -independent drop in type 1 diabetes mellitus in children
Source: bioRxiv or medRxiv preprint supplement (doi:10.1101/2022.12.08.22283120), 2022-12-13
Supplement: Supplementary file [file media-10.pdf]

Supplementary Table 2: Statistic NCS Diabetes vs. Control

| <b>Nerve</b>   | <b>diabetes gr. [m/s]</b> | <b>control gr. [m/s]</b> | <b>p-Value</b> | <b>n Control</b> | <b>n Diabetes</b> |
|----------------|---------------------------|--------------------------|----------------|------------------|-------------------|
| N.peroneus     | 47.0                      | 52                       | 0.0000 ****    | 33               | 53                |
| N.tibialis     | 47.0                      | 50                       | 0.0042 **      | 20               | 48                |
| N.medianus (m) | 55.6                      | 58                       | 0.0281 *       | 29               | 53                |
| N.medianus (s) | 51.5                      | 55                       | 0.0019 **      | 24               | 46                |
