# Supplementary material for: Peripheral nerve conduction speed shows a disease control-dependent and -independent drop in type 1 diabetes mellitus in children
Source: bioRxiv or medRxiv preprint supplement (doi:10.1101/2022.12.08.22283120), 2022-12-13
Supplement: Supplementary file [file media-11.pdf]

Supp. Table 3:Control Data Study Group

| Index | Age [y] | Sex | Height [cm] | Weight [kg] | right            |                  |                      |                      |                      |
|-------|---------|-----|-------------|-------------|------------------|------------------|----------------------|----------------------|----------------------|
|       |         |     |             |             | N.peroneus [m/s] | N.tibialis [m/s] | N.medianus (m) [m/s] | N.medianus (s) [m/s] | N.peroneus (s) [m/s] |
| 33    | 5-10    | m   | 111.00      | 16.20       | 47.00            |                  |                      |                      |                      |
| 28    | 5-10    | w   | 116.70      | 21.50       | 57.00            |                  |                      |                      |                      |
| 11    | 5-10    | m   | 111.00      | 16.70       | 52.00            | 41.00            | 58.00                | 53.00                |                      |
| 1     | 5-10    | w   | 119.00      | 22.70       |                  |                  |                      |                      |                      |
| 22    | 5-10    | m   | 123.00      | 22.00       | 55.00            |                  |                      |                      |                      |
| 26    | 5-10    | w   | 127.50      | 33.40       | 57.00            |                  |                      |                      |                      |
| 4     | 5-10    | w   | 140.00      |             | 56.00            | 54.00            | 60.00                | 52.00                |                      |
| 32    | 5-10    | m   | 135.00      | 28.00       | 48.00            | 46.00            |                      |                      |                      |
| 3     | 5-10    | m   | 150.70      | 44.50       |                  |                  |                      |                      |                      |
| 27    | 5-10    | w   | 128.10      | 25.60       | 56.00            |                  | 53.00                | 64.00                |                      |
| 31    | 5-10    | m   | 152.80      | 48.80       | 52.00            | 51.00            | 57.00                | 52.00                |                      |
| 20    | 5-10    | w   | 146.30      | 55.00       | 55.00            | 50.00            | 58.00                | 64.00                |                      |
| 24    | 10-15   | w   | 149.80      | 36.40       | 55.00            |                  | 56.00                | 52.00                |                      |
| 35    | 10-15   | m   | 158.00      | 44.00       | 58.00            | 58.00            | 53.00                | 57.00                |                      |
| 30    | 10-15   | w   | 149.30      | 40.00       | 51.00            | 47.00            | 60.00                | 54.00                |                      |

Supp. Table 3:Control Data Study Group

|    |       |   |        |       |       |       |       |       |
|----|-------|---|--------|-------|-------|-------|-------|-------|
| 21 | 10-15 | w | 157.00 | 35.50 | 58.00 | 53.00 | 61.00 | 63.00 |
| 10 | 10-15 | w |        | 9.00  |       |       |       |       |
| 23 | 10-15 | w | 160.00 | 64.30 | 54.00 |       | 57.00 |       |
| 17 | 10-15 | w | 138.30 | 32.80 | 49.00 | 45.00 | 53.00 | 61.00 |
| 7  | 10-15 | m | 160.00 | 53.00 | 49.00 | 53.00 | 61.00 | 55.00 |
| 5  | 10-15 | w | 161.00 | 62.00 |       |       | 59.00 | 51.00 |
| 18 | 10-15 | w | 166.00 | 61.30 | 53.00 | 58.00 | 60.00 | 63.00 |
| 29 | 10-15 | w | 162.50 | 69.50 |       |       |       |       |
| 12 | 10-15 | w | 155.00 | 38.00 |       |       | 59.00 |       |
| 15 | 10-15 | w | 164.30 | 56.00 | 49.00 | 50.00 | 62.00 | 55.00 |
| 13 | 15-20 | m | 184.00 | 65.90 |       |       | 55.00 |       |
| 19 | 15-20 | w | 159.30 | 42.40 | 50.00 | 54.00 | 56.00 | 63.00 |
| 2  | 15-20 | w | 164.50 | 51.00 | 51.00 | 54.00 |       |       |
| 16 | 15-20 | m | 163.50 | 59.30 | 52.00 | 50.00 |       |       |
| 34 | 15-20 | m | 159.00 | 55.00 |       |       |       |       |
| 25 | 15-20 | w | 169.80 | 68.70 | 47.00 | 48.00 | 56.00 | 55.00 |
| 6  | 15-20 | w | 160.00 | 55.00 | 51.00 | 43.00 |       |       |
