# Supplementary material for: Peripheral nerve conduction speed shows a disease control-dependent and -independent drop in type 1 diabetes mellitus in children
Source: bioRxiv or medRxiv preprint supplement (doi:10.1101/2022.12.08.22283120), 2022-12-13
Supplement: Supplementary file [file media-12.pdf]

Supp. Table 4: Summary of control data (n=32, #Male=11)

| <b>Parameter</b>   | <b>Min</b> | <b>Mean</b> | <b>Max</b> |
|--------------------|------------|-------------|------------|
| Age at NCS (y)     | 5.95       | 11.73       | 18.95      |
| Height at NCS (cm) | 111.00     | 148.46      | 184.00     |
| Weight at NCS (cm) | 9.00       | 43.02       | 69.50      |
